# Supplementary material for: “Mi Casa, Tu Casa”: the coati nest as a hub of Trypanosoma cruzi transmission in the southern Pantanal biome revealed by molecular blood meal source identification in triatomines
Source: PubMed Central journal article supplement (PMC9872340; doi:10.1186/s13071-022-05616-w), 2023-01-23
Supplement: 13071_2022_5616_MOESM1_ESM.pdf [file 13071_2022_5616_MOESM1_ESM.pdf]

|                        | 370                                                      | 380 | 390 | 400 | 410 | 420 |
|------------------------|----------------------------------------------------------|-----|-----|-----|-----|-----|
| AF232019 Ttetradactyla | ..... ..... ..... ..... ..... ..... ..... ..... .....    |     |     |     |     |     |
| KT818552 Ttetradactyla | ATAGCAACCGCATTCATGGGCTATGTACTTCCATGAGGACAAATATCATTCTGAGG |     |     |     |     |     |
| KT626616 Ttetradactyla | .....G..C.....                                           |     |     |     |     |     |
| KT818551 Tmexicana     | .....C.....                                              |     |     |     |     |     |
| AJ421450 Ttetradactyla | .....C.....                                              |     |     |     |     |     |
| AF232023 Ttetradactyla | .....C.....                                              |     |     |     |     |     |
| KT626617 Ttetradactyla | .....C.....                                              |     |     |     |     |     |
| AF232021 Ttetradactyla | .....                                                    |     |     |     |     |     |
| AF232022 Ttetradactyla | .....A.....A..C..C.....                                  |     |     |     |     |     |
| AF232017 Ttetradactyla | .....A.....A..C..C.....                                  |     |     |     |     |     |
| 4343C3_cytFA           | .....                                                    |     |     |     |     |     |
| 4343C7_cytFA           | .....                                                    |     |     |     |     |     |
| 4345C2_cytFA           | .....                                                    |     |     |     |     |     |
| 4345C7_cytFA           | .....                                                    |     |     |     |     |     |
| 4346C10_cytFA          | .....C..C.....                                           |     |     |     |     |     |
| 4347C5_cytFA           | .....C..C.....                                           |     |     |     |     |     |
| 4348C3_cytFA           | .....C..C.....                                           |     |     |     |     |     |
| 4352C2_cytFA           | .....C..C.....                                           |     |     |     |     |     |
| 4347C3_cytFA           | .....G.....                                              |     |     |     |     |     |
| 4351C4_cytFA           | .....G.....                                              |     |     |     |     |     |
| 4345C8_cytFA           | .....                                                    |     |     |     |     |     |
| 4348C2_cytFA           | .....                                                    |     |     |     |     |     |
| 4348C8_cytFA           | .....                                                    |     |     |     |     |     |
| 4351C2_cytFA           | .....                                                    |     |     |     |     |     |
| 4351C3_cytFA           | .....                                                    |     |     |     |     |     |
| 4351C5_cytFA           | .....                                                    |     |     |     |     |     |
| 4351C6_cytFA           | .....                                                    |     |     |     |     |     |
| 4351C7_cytFA           | .....                                                    |     |     |     |     |     |
| 4351C8_cytFA           | .....                                                    |     |     |     |     |     |
| 4351C9_cytFA           | .....                                                    |     |     |     |     |     |
| 4351C10_cytFA          | .....                                                    |     |     |     |     |     |
| 4352C6_cytFA           | .....                                                    |     |     |     |     |     |
| 4352C9_cytFA           | .....                                                    |     |     |     |     |     |
| 4352C10_cytFA          | .....                                                    |     |     |     |     |     |
| 4353C1_cytFA           | .....                                                    |     |     |     |     |     |
| 4353C6_cytFA           | .....                                                    |     |     |     |     |     |
| 4353C10_cytFA          | .....                                                    |     |     |     |     |     |
| 4354C1_cytFA           | .....                                                    |     |     |     |     |     |
| 4356C1_cytFA           | .....                                                    |     |     |     |     |     |
| 4357C1_cytFA           | .....                                                    |     |     |     |     |     |
| 4358C1_cytFA           | .....                                                    |     |     |     |     |     |
| 4359C1_cytFA           | .....                                                    |     |     |     |     |     |
| 4360C1_cytFA           | .....                                                    |     |     |     |     |     |
| 4361C1_cytFA           | .....                                                    |     |     |     |     |     |
| 4362C1_cytFA           | .....                                                    |     |     |     |     |     |
| 4363C1_cytFA           | .....                                                    |     |     |     |     |     |
