# Supplementary material for: “Mi Casa, Tu Casa”: the coati nest as a hub of Trypanosoma cruzi transmission in the southern Pantanal biome revealed by molecular blood meal source identification in triatomines
Source: PubMed Central journal article supplement (PMC9872340; doi:10.1186/s13071-022-05616-w), 2023-01-23
Supplement: 13071_2022_5616_MOESM2_ESM.pdf [file 13071_2022_5616_MOESM2_ESM.pdf]

500 510 520 530 540 550 560 570 580 590 600

KT818552 *T. tetradactyla* CAAACTGGGATTAGATACCCCACTATGCCTAGCCGTAAACCAAAATATCCAACAACAGAAATATTCGCCAGAGTACTACTAGCAACAGCTAAAAACTCAAAGGACTTGG  
EF405913 *T. tetradactyla* .....  
EF405912 *T. tetradactyla* .....  
AJ421450 *T. tetradactyla* .....  
AY012097 *T. tetradactyla* .....  
KT818551 *T. mexicana* .....T.....  
Z48945 *T. tetradactyla* .....T.....  
AJ278154 *T. tetradactyla* .....G.....  
L4342C4 .....  
L4347C7 .....  
L4348C1 .....  
L4350C5 .....  
L4351C1 .....  
L4351C5 .....  
L4353C1 .....  
L4359C5 .....  
L4363C2 .....  
L4350C7 .....  
L4354C1 .....  
L4355C1 .....  
EF405915 *M. tridactyla* .....T.....A.....T.....T.....  
AY012098 *M. tridactyla* .....T.....A.....T.....T.....  
EF405914 *M. tridactyla* .....T.....A.....T.....T.....

610 620 630 640 650 660 670 680 690 700 710

KT818552 *T. tetradactyla* CGGTGCTTCATATCCACCTAGAGGAGCCGTTCCTATAATCGATAAACCCCGATAAACCTCACCACCTCTTGCTAATACAGCCTATATACCGCCATCTCTAGCAA  
EF405913 *T. tetradactyla* .....  
EF405912 *T. tetradactyla* .....  
AJ421450 *T. tetradactyla* .....  
AY012097 *T. tetradactyla* .....  
KT818551 *T. mexicana* .....  
Z48945 *T. tetradactyla* .....  
AJ278154 *T. tetradactyla* .....  
L4342C4 .....G.....TC.....  
L4347C7 .....G.....TC.....  
L4348C1 .....G.....TC.....  
L4350C5 .....G.....TC.....  
L4351C1 .....G.....TC.....  
L4351C5 .....G.....TC.....  
L4353C1 .....G.....TC.....  
L4359C5 .....G.....TC.....  
L4363C2 .....G.....TC.....  
L4350C7 .....TC.....  
L4354C1 .....TC.....  
L4355C1 .....TC.....  
EF405915 *M. tridactyla* .....G.....TC.....  
AY012098 *M. tridactyla* .....G.....TC.....  
EF405914 *M. tridactyla* .....T.....G.....TC.....
